# Supplementary material
Source: Springer Nature journal article supplement (https://www.springermedizin.de/resource/supplementary/13256_2008_572_MOESM1_ESM.pdf/9646278)

[A]

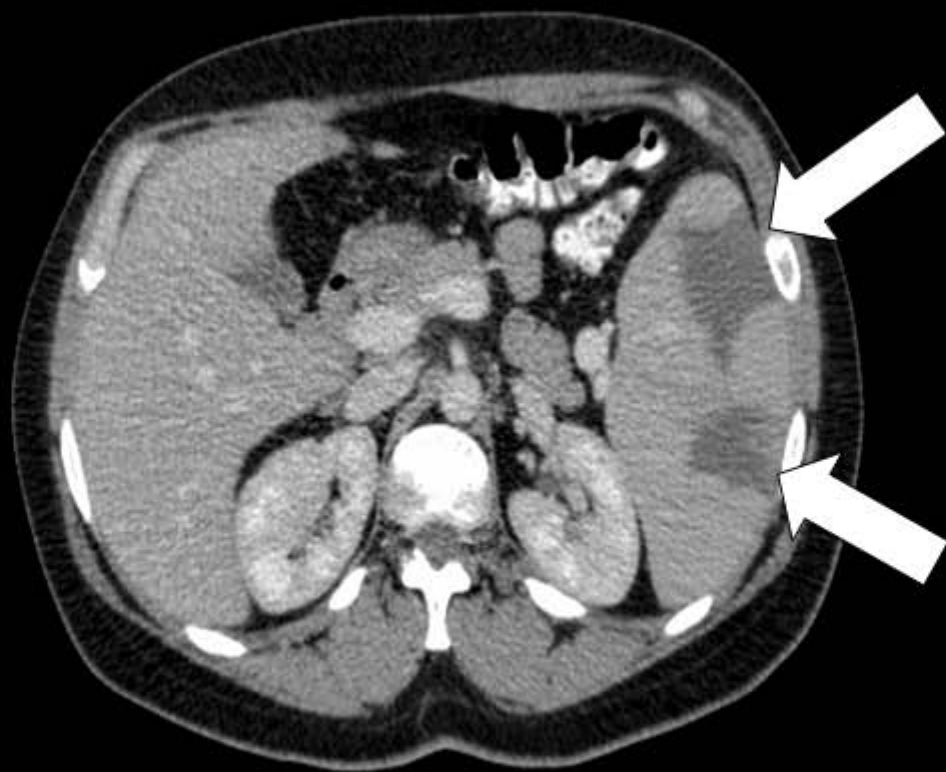

[R]

[L]

[P]

Supplement: MOESM1 [file 9646278]
